# Supplementary material for: Radiological Outcomes of Femoral Head Resection in Patients with Cerebral Palsy: A Retrospective Comparative Study of Two Surgical Procedures
Source: MDPI journal article supplement (doi:10.3390/children8121105), 2021-12-01
Supplement: s1 [file s1]

# Supplementary File

**Supplementary Table S1.** Heterotopic ossification classification

| Grade | Radiographic evidence                                                                                                                  |
|-------|----------------------------------------------------------------------------------------------------------------------------------------|
| 0     | No evidence of the bone island                                                                                                         |
| I     | Islands of bone within the soft tissue around the hip                                                                                  |
| II    | Bone spurs from the pelvis or proximal end of the femur, leaving at least one centimeter between opposing surfaces                     |
| III   | Bone spurs from the pelvis or proximal end of the femur, reducing the space between opposing bone surfaces to less than one centimeter |
| IV    | Apparent bone ankylosis of the hip                                                                                                     |

**Supplementary Table S2.** Classification of complications using the Clavien-Dindo-Sink classification system

| <b>Degree of Complication</b>                                                                                                               | <b>Examples</b>                                                                                            |
|---------------------------------------------------------------------------------------------------------------------------------------------|------------------------------------------------------------------------------------------------------------|
| I: (Any deviation from normal postoperative course, no intervention required)                                                               | No postoperative adverse events                                                                            |
| II: (Pharmaceuticals, blood transfusion, parenteral nutrition)                                                                              | Pain medication adjustment<br>oral antibiotic therapy for wound infections, postoperatively                |
| III: (Surgical, endoscopic or radiological intervention necessary).<br>IIIa = without general anesthesia;<br>IIIb = with general anesthesia | Transfusion<br>Urinary tract infection with antibiotic use<br>Wound infection with intravenous antibiotics |
| IV: (Life-threatening intensive medical treatment necessary)<br>IVa= single organ failure<br>IVb = multiorgan failure                       | Re-resection for pain/cerclage fracture<br>Wound dressing because of wound infection                       |
| V: (Dead)                                                                                                                                   | Intensive care unit due to respiratory distress, postoperatively                                           |

## Supplementary Figures

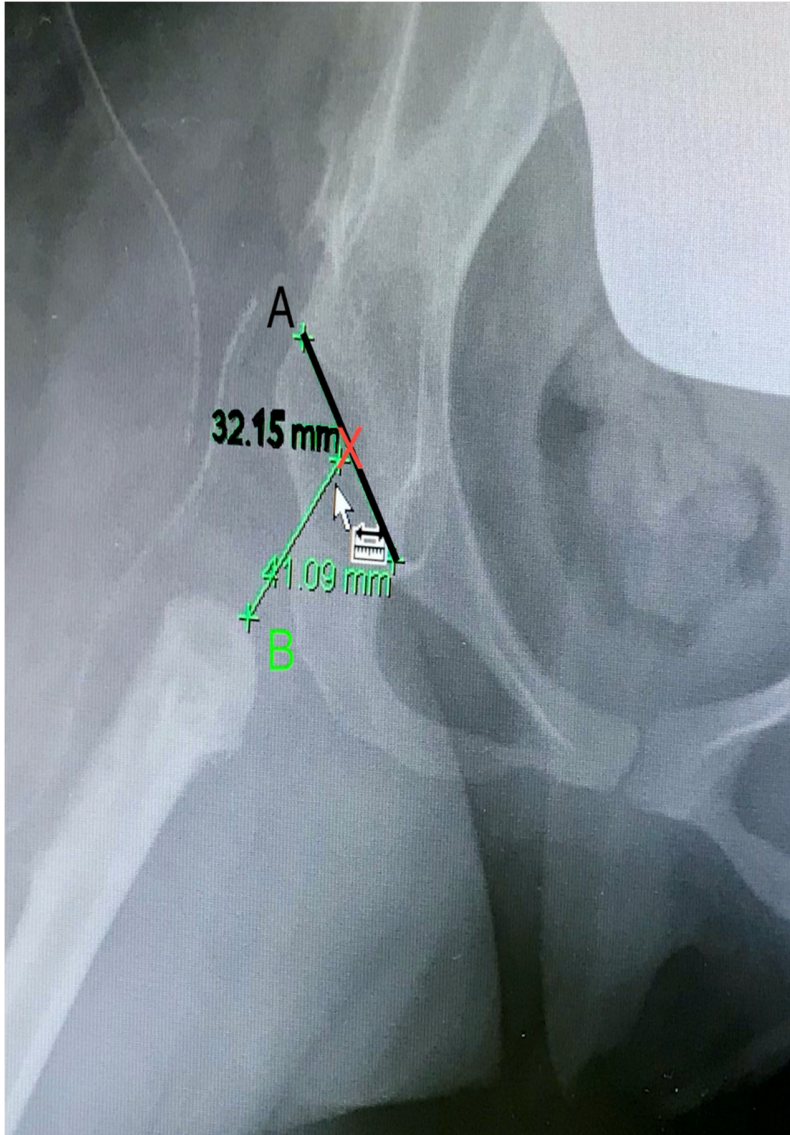

**Supplementary Figure S1.** Measurement of the distance between the articular surface and the femur after surgery

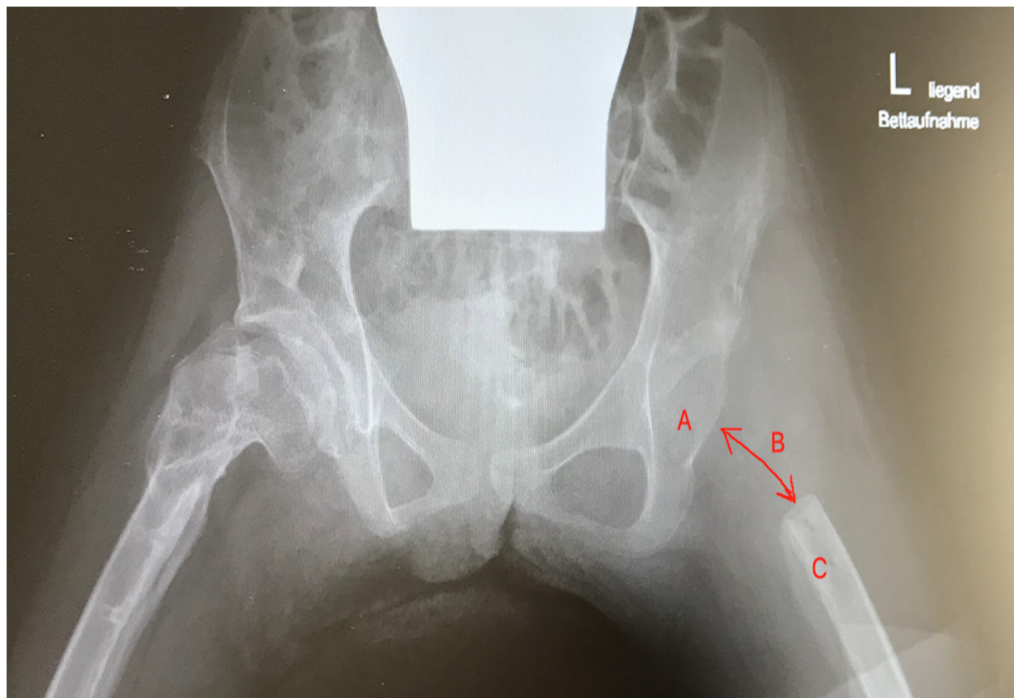

**Supplementary Figure S2.** A postoperative radiograph showing no telescoping. (A) hip joint; (B) the distance between A and C; (C) the femur

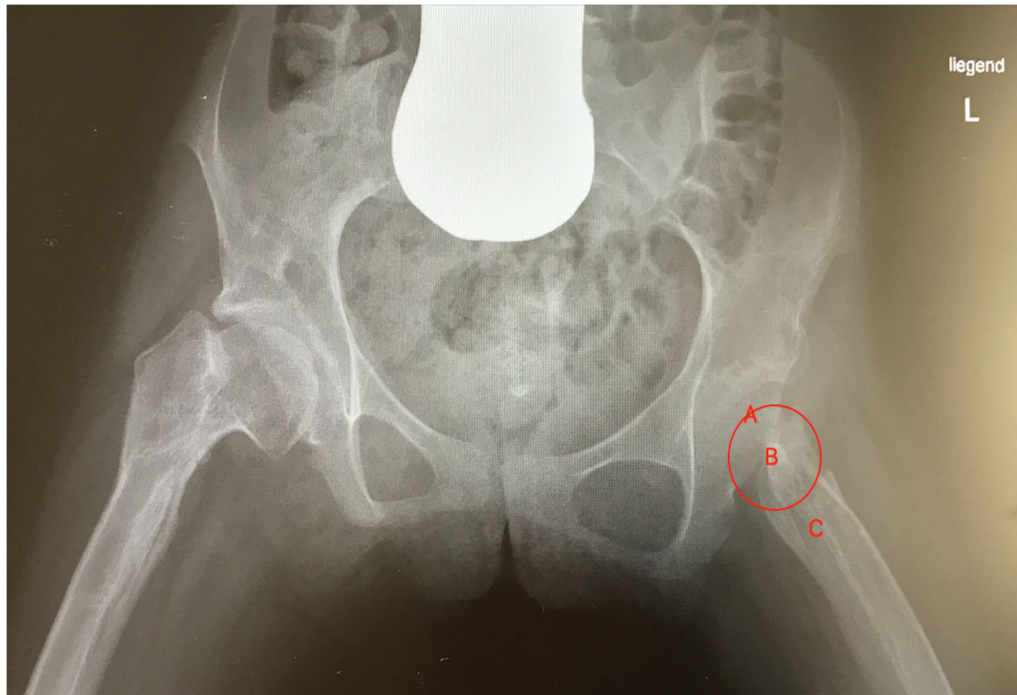

**Supplementary Figure S3.** A radiograph showing telescoping at follow-up. (A) hip joint; (B) the distance between A and C; (C) the femur

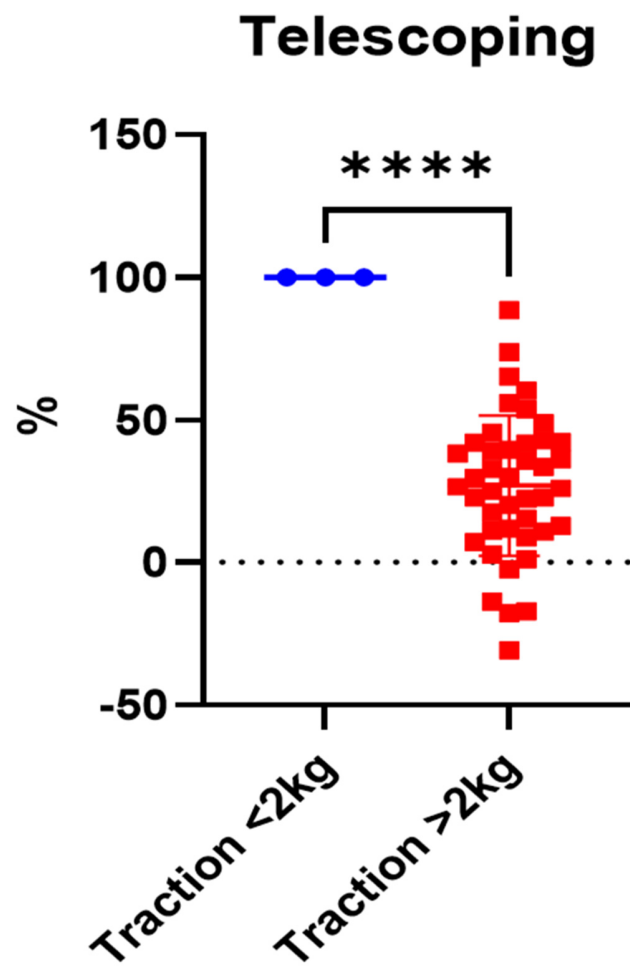

Supplementary Figure S4. The correlation between telescoping and traction weight

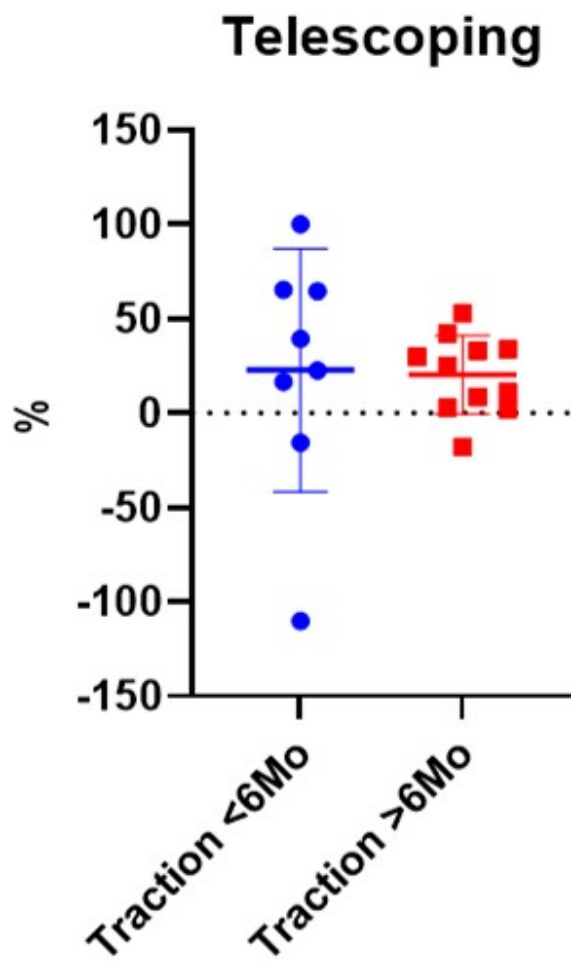

**Supplementary Figure S5.** The correlation between traction duration and telescoping
